# Supplementary material for: Differentiation Capacity of Human Mesenchymal Stem Cells into Keratocyte Lineage
Source: PubMed Central journal article supplement — Invest Ophthalmol Vis Sci. 2019 Jul;60(8):3013–23. doi: 10.1167/iovs.19-27008 (PMC6636549; doi:10.1167/iovs.19-27008), 2019-07
Supplement: iovs-60-08-02_s02.pdf [file iovs-60-08-02_s02.pdf]

**Supplementary figures and table**

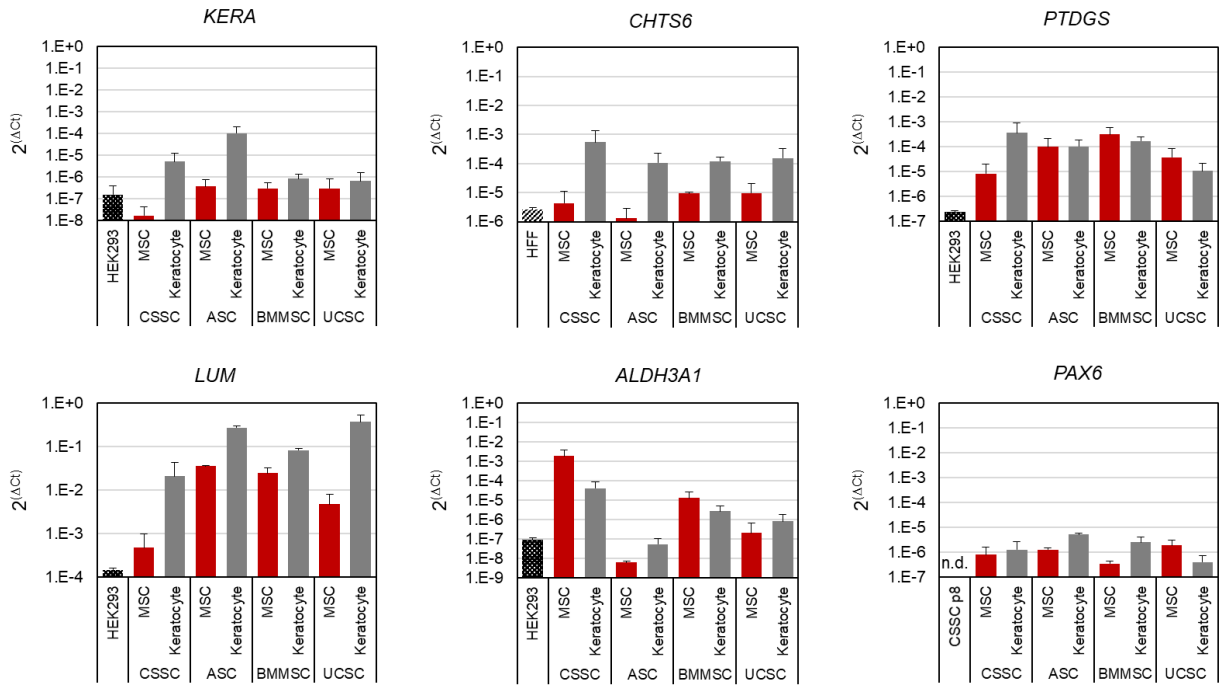

**Figure S1:** Transcript levels of keratocyte lineage markers as calculated by  $2^{-(Ct_{target}/Ct_{housekeeping\ genes})}$ . Transcript levels for HEK293T cells, human foreskin fibroblasts (HFF) and CSSC at a later passage (p8) were plotted against the MSC and the keratocyte lineage-induced MSC. MSC: undifferentiated MSC; Keratocyte: day 7 of keratocyte lineage induction; n.d.: not detected.

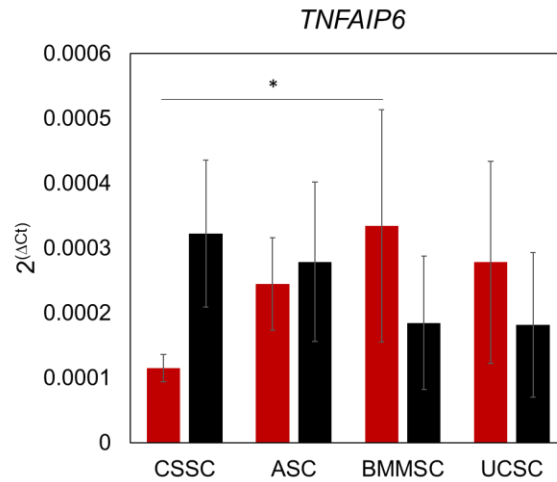

**Figure S2:** Transcript levels of *TNFAIP6* as calculated by  $2^{-(Ct_{TNFAIP6}/Ct_{housekeeping\ genes})}$ . *GAPDH* and *18S* were used as housekeeping genes. p=0.0143; ANOVA, followed by all pairs Tukey's test.

**Table S1:** List of primer pairs used for RT-PCR.

| Gene ID (name)                                                       | Forward 5'-3'            | Reverse 5'-3'            |
|----------------------------------------------------------------------|--------------------------|--------------------------|
| <b>Stem cell/progenitor cell markers</b>                             |                          |                          |
| <b>SOX2</b><br>(Sex determining region Y-box 2)                      | AACCCCAAGATGCACAACCTC    | GCTTAGCCTCGTCGATGAAC     |
| <b>NANOG</b>                                                         | GATTTGTGGGCCTGAAGAAA     | ATGGAGGAGGGAAGAGGAGA     |
| <b>ABCG2</b><br>(ATP Binding Cassette Subfamily G Member 2)          | GCAGGGACGAACAATCATCT     | CCTGAGGCCAATAAGGTGAG     |
| <b>Adipogenic markers</b>                                            |                          |                          |
| <b>FABP4</b><br>(Fatty acid binding protein 4)                       | ATGGGATGGAAAATCAACCA     | GTGGAAGTGACGCCTTTCAT     |
| <b>PLIN</b><br>(Perilipin)                                           | AAACAGCATCAGCGTTCCCCA    | AGTGTGGCAGCAAATTCCG      |
| <b>Osteogenic markers</b>                                            |                          |                          |
| <b>ALP</b><br>(Alkaline phosphatase)                                 | TACAAGGTGGTGGGCGGTGAACGA | TGGCGCAGGGGCACAGCAGAC    |
| <b>SPARC</b><br>(Secreted Protein, Acidic, Cysteine-Rich)            | GGCATCAAGCAGAAGGAT       | GCACCGTTAATGTATTCACT     |
| <b>BGLAP</b><br>(Bone gamma-carboxyglutamic acid-containing protein) | AGCAAAGGTGCAGCCTTTGT     | GCGCCTGGGTCTCTTCACT      |
| <b>RUNX2</b><br>(Runt-related transcription factor 2)                | TGGTTACTGTCATGGCGGGTA    | TCTCAGATCGTTGAACCTTGCTA  |
| <b>Chondrogenic markers</b>                                          |                          |                          |
| <b>ACAN</b><br>(Aggrecan)                                            | AGCCTGCGCTCCAATGACT      | TAATGGAACACGATGCCTTTCA   |
| <b>COMP</b><br>(Cartilage Oligomeric Matrix Protein)                 | AGCAGATGGAGCAAACGTATTG   | ACAGCCTTGAGTTGGATGCC     |
| <b>Keratocyte-lineage markers</b>                                    |                          |                          |
| <b>ALDH3A1</b><br>(Aldehyde Dehydrogenase 3 Family Member A1)        | TGGAACGCCTACTATGAGGAG    | GGGCTTGAGGACCACTGAG      |
| <b>LUM</b><br>(Lumican)                                              | CCTGGTTGAGCTGGATCTGT     | TGGTTTCTGAGATGCGATTG     |
| <b>KERA</b><br>(Keratocan)                                           | ATCTGCAGCACCTTCACTT      | CATTGGAATTGGTGGTTTGA     |
| <b>PTGDS</b><br>(Prostaglandin D Synthase)                           | CGGGGTCCCTCGGCTCTAC      | CTGGGGTCTGGGTTCCGGCT     |
| <b>CHST6</b><br>(Carbohydrate Sulfotransferase 6)                    | GAAATCCGTGCGCTCTACG      | GTCCAGATCCGTGGGTGAT      |
| <b>PAX6</b><br>(Paired box protein 6)                                | TGGGCAGGTATTACGAGACTG    | ACTCCCGCTTATACTGGGCTA    |
| <b>TSG-6 transcript</b>                                              |                          |                          |
| <b>TNFAIP6</b><br>(TNF Alpha Induced Protein 6)                      | AAGCACGGTCTGGCAAATACAAGC | ATCCATCCAGCAGCACAGACATGA |
| <b>Housekeeping genes</b>                                            |                          |                          |
| <b>18S</b>                                                           | CCCTGTAATTGGAATGAGTCCAC  | GCTGGAATTACCGCGGCT       |
| <b>GAPDH</b><br>(Glyceraldehyde-3-Phosphate Dehydrogenase)           | ACAACCTTTGGTATCGTGAAGG   | GCCATCACGCCACAGTTTC      |
| <b>UBC</b><br>(Ubiquitin)                                            | CTGGAAGATGGTCGTACCCTG    | GGTCTTGCCAGTGAGTGTCT     |
